# Supplementary material
Source: Research Square preprint supplement (doi:10.21203/rs.3.rs-8766726/v1)
Supplement: Supplementary file 1 [file c95d7e76f88323899f73213c.docx]

# Appendix

## Table A1 Overview of NLP causality extraction methods

| **Methods** | **Rules and linguistics-based** | **Traditional machine learning-based** | **Deep learning-based** | |
| --- | --- | --- | --- | --- |
| **Common deep neural model** | **Language model** |
| **Pros** | - Easy to interpret - No need for large-scale labelled data - High stability - Fast deployment | - More flexible than rule-based methods - Relatively good transparency - Less need for labelled data than deep learning methods | - Automated feature learning - Capable of handling long-range dependencies, implicit causal relationships, and multi-level causal relationships - Strong transferability - Able to process large-scale data | |
| **Cons** | - Difficult to capture complex and implicit causal relationships - Poor portability - High maintenance costs | - Strong feature dependency - Limited transferability - Difficult to capture long-range dependencies or deep semantic relationships | - Requiring a large amount of labelled data for adequate training, high labelling cost - Training and inference require high performance computing resources, high hardware costs - Models are black-box, difficult to clearly explain why a causal relationship is predicted - Unstable, sensitive to small datasets or noise and vulnerability to dataset poisoning | |
| **Representative technologies or models** | - Causal signal word regular expression construction - Syntactic dependency parsing - Pattern matching | - SVM - CRF - Decision Tree - Random Forest - Logistic Regression - Markov Logic Networks - Maximum Entropy (ME) - Naïve Bayes (NB) | - RNN (LSTM, GRU, LSTM) - CNN - GCN | - BERT (RoBERTa, SpanBERT, ELECTRA) - LLM (GPT, T5) |
| **Selection suggestion** | - Small dataset, without large-scale labeled data - Causal relationships are clearly defined and easily captured explicitly - Requiring Rapid development | - Medium to small dataset size - Flexible expression forms with distinct features - Need for domain-specific feature customisation | - Large dataset - Task involves complex causal relationships - Requiring deep semantic understanding of long texts | |
| **Further reading/overview resources** | - Causality extraction: A comprehensive survey and new perspective (Ali et al., 2023) - A survey of the extraction and applications of causal relations (Drury et al., 2022) - A survey on extraction of causal relations from natural language text (Yang et al., 2022) | | | |

## Causal pair extraction model

This end-to-end model is mainly composed of an encoder and a decoder. First, for a given text segment consisting of *n* tokens, vectorized representation is obtained by encoding the text with the pre-trained ClimateBERT model. This encoded text is then concatenated with part-of-speech tag embeddings to obtain the encoder’s hidden state. The hidden states are then processed through an attention mechanism to produce a context vector. Specifically, the context vector is generated by concatenating two attention vectors. These attention vectors are computed based on the decoder’s previous hidden state, and the average of the vectors of the causalities already generated, which are then attended to the sequence of hidden states from the encoder, as shown in *Eq*. (1).

Next, the process moves to the decoder stage, where the concatenation of the context vectorand the average of all previous decoding vectorsis passed, along with previous decoding vector, into an LSTM to generate the next hidden state, as shown in *Eq*. (2). Finally, two pointer networks are used to identify the cause and effect entities separately. First, the concatenation of the decoder vectorand the encoder vectoris passed into a Bi-LSTM layer to obtain hidden representations, which are then passed to two feed-forward networks (FFNs) to identify the start and end positions of the cause entity, as shown in *Eq*. (3). Then, another pointer network extracts the effect entity by concatenating the hidden statesfrom the first pointer network’s Bi-LSTM layer and passing them into a second Bi-LSTM and two FFNs, as shown in *Eq*. (4). The final output is all the causal pairs of predictions corresponding to each causal statement.

, (1)

(2)

(3)

(4)

## Causal entity merging

Semantic similarity is calculated as the cosine similarity between Sentence-Transformer embeddings, while character similarity is measured using Levenshtein distance. These two similarity measures are combined using weighted aggregation to produce an overall similarity score. To increase flexibility, higher semantic similarity allows a lower requirement for character similarity. The similarity threshold is dynamically adjusted using a hyperbolic tangent (*tanh*) function and constrained to a minimum value of 0.5 to preserve accuracy. The parameter *q* in *Eq.* (5) controls the merging sensitivity.

(5)

## Table A2 Examples of questions to explore with causal system maps and the subsections of a map that might be used

| **Question type** | **Example question** | **Subsection of map used** |
| --- | --- | --- |
| Questions about outcomes | What are the direct influences on key system functions and outcomes stakeholders care about? | Start with the node(s) representing outcomes and functions, and look for nodes immediately influencing them, i.e. one or more ‘steps’ away following only arrows into the outcome/function. |
| Questions about expected change | What might be the impacts of upcoming changes in the system? | Start with the node(s) that represent the change expected, then look at the nodes they influence, i.e. one or more ‘steps’ away only following only arrows away from the change. |
| Questions about interactions | What interactions, trade-offs, or synergies may exist between important outcomes and functions, and between interventions? | Pick two or more nodes which represent outcomes/functions/interventions, and then check whether they influence each other (i.e. are there causal paths between them, with arrows in all the same direction) and/or check whether they both/all affect other outcomes of importance, and whether they influence them in the same direction or not. |
| Questions about risk | What might be a risk or vulnerability in the system? | Look for nodes in the map which seem to have structural importance but which *no* stakeholders have much influence over, i.e. nodes which influence things stakeholders care about, or influence a lot of things in the map (i.e. have a high out-degree or betweeness centrality). |
| Questions about leverage and interventions | What might be an opportunity for effective intervention in the system – a ‘lever’? | Look for nodes in the map which seem to have structural importance and which stakeholders *do* have influence over, i.e. nodes which influence things stakeholders care about, or influence a lot of things in the map (i.e. have a high out-degree or betweeness centrality). |
| Questions about feedbacks | Are there any reinforcing or balancing feedbacks that might dominate the system behaviour? | Look for causal loops in the map and consider the importance of these and whether they drive behaviour. |

## Possible causes of the error

Extraction errors arise for various reasons. On one hand, our broad causal scope includes diverse sentence structures and phrasing to express causality, with many implicit causal relationships. On the other hand, the limited quantity of labeled data leads to imbalanced entity categories and constrained features learned by the model. While errors are inevitable, automated extraction of causal pairs has significantly improved map construction efficiency. Minimising errors requires selecting data with standardised structures and ensuring labeled data covers a wide range of causal structures and entity expressions. It has been shown that higher frequency of causal mentions improves model performance (Feng et al., 2024).

## A comparison between extraction results using our labeled data and public dataset

We trained the pointer network model proposed in section 3.3 using the extended SemEval 2010 Task 8 dataset from the literature (Li et al., 2021). However, the model’s performance in recognising multiple, parallel, and compound causal phrases was unsatisfactory. The example (Fig. A1) compares the extraction results of the model trained on the public dataset and the one trained on the labelled data (described below). This indicates significant domain-specific differences, where variations in causal structure and entity expressions can affect the model’s performance. Therefore, relying solely on a public dataset may be insufficient, and a small amount of labelled data can significantly enhance model performance.

**Fig. A1** Comparison of causal pair extraction results with and without domain-trained models

## Table A3 Synonymous entity alignment

| **Node names used in the map** | **Other expressions merged** |
| --- | --- |
| air pollution | air pollutant |
| capital, resource | capital and labor to the low-carbon industry, fixed capital formation, capital waste, capital input, resource waste, resource inputs, coal resources, capital |
| carbon cap policy | emission limits |
| carbon capture, utilization, and storage (CCUS) | CCS retrofit of conventional coal plants, retrofitting existing conventional coal power plants with CCS, new coal power plants with CCS, carbon capture and storage |
| carbon emissions | CO2 emissions, Greenhouse Gas (GHG) emission, total emission cap in a rate-based ETS, inhibitory effect of carbon emissions |
| carbon market activity | trading volume |
| carbon market size | carbon market scale |
| carbon price | uncertainty of carbon price, fixed and low carbon prices |
| carbon tax | carbon tax policy, CO2 tax, tax revenue, continuity of carbon tax policy, stability of carbon tax policy, stringency of carbon tax policy |
| certified emission reductions (CERs) | demand for certified emission reductions (CERs) |
| clean development mechanism (CDM) | limitations on clean development mechanism (CDM) |
| construction | construction power plants |
| cost for carbon mitigation | carbon reduction costs, carbon mitigation costs, carbon cost, ETS costs |
| curtailment cost | cost of power curtailment, phenomenon of power curtailment |
| distributional impacts | differentiated provincial impacts, distributional consequences from national policies, regional differences |
| economic improvement of thermal power | stable operation of thermal power, profit incentives in coal use |
| economic size | rapid industrialization, economic activity effect |
| education expenditure | local public expenditure intensity on educational development (EO) |
| electricity price | clearing price, product price, output price of energy-intensive products, price changes, price of RE (also average electricity) |
| Emissions Trading Scheme (ETS) | carbon emission allowance, carbon emission trading, ETS, carbon trading policy, carbon permits, longer the carbon trading policy |
| employment | employment rate |
| energy consumption | energy consumes, energy input, invest in electric energy |
| energy storage | energy reserves, storage of electricity, energy storage system, spare capacity |
| energy structure adjustment | energy and industry structure adjustment, energy system, power structure, energy structural shift, industrial structural shifts, power source structure |
| environmental expenditure | environmental protection input, environmental protection investment, output intensity of local public environmental protection expenditures |
| equity concerns | conflict of interests at subnational levels, barriers to the implementation of carbon abatement policies, income inequality |
| exports | outflow |
| fossil fuel price | input materials price, price of oil |
| GDP | economic sacrifice, GDP loss, economic losses, economic growth, GDP per capita |
| generation capacity | additional generation capacity, total generation capacity |
| generation cost of renewable energy | cost of RE power, energy costs |
| generation cost of thermal power | cost of energy-intensive sectors, external cost into fossil fuels, thermal power operation cost, cost of coal for coal-fired power |
| generation costs | cost for electricity supply, production cost, cost of power generation, cost of electricity, marginal cost, system costs |
| governments expenditure | local public expenditure, fiscal expenditure |
| household consumption | consumption patterns, consumer consumption |
| imports | provincial import |
| industry activity levels | industry activity, provincial industry |
| investment in power generation | generation capacity investment, energy investment, investment in the power |
| investment in renewable energy | investment in RERs, investment to form the low-carbon industry, invest in renewable energy, investment for wind power, investment for solar power, invest in renewable energy generation |
| investment in thermal power | thermal investment, investment in high-emission thermal power |
| knowledge spillover | knowledge acquisition, knowledge accumulation |
| market competitiveness | inter-region industry competitiveness, market competition, market inefficiency, electricity market, electricity market reform |
| market demand | power demand, demand, energy-intensive products demand, electricity demand, elasticity of electricity demand, energy demand |
| market supply | power supply, electricity supply |
| operating efficiency level | energy efficiency of thermal power, coal-power conversion coefficient (CPCC), carbon emission resources allocation, coal-fired power output rate, electricity generation efficiency, power losses |
| people awareness of energy conservation and emission reduction | public support, commercial opposition |
| population growth rate | fertility rate in society, (benefit) population, population growth |
| power consumption | income elasticity of residential electricity consumption, electricity consumption |
| power generation | production of power generation enterprises, power generation system |
| power systems stability | Balance of the Peak Load, power system instability, Power system flexibility, systems flexibility, power supply stability, electricity generation gap |
| production decisions | load development, behavior of firms, business planning of producers and other trading entities, decision of the planning, priority of the development strategies, provincial preference for the national-level policies |
| production output | output loss, production output of energy-intensive sectors, output of industrial sub-sectors, output of thermal power firms, industrial production, output of thermal power units |
| public health | health/diseases, human mortalities and morbidities |
| R&D spending | public expenditure on science and technology (TE), invest in green technology |
| regulated market | excessive regulation, regulatory process |
| renewable energy market share | renewable energy resources (RERs), RERs market share, renewable power, renewable resources, green power generation, renewable energy generation |
| residents living habits | normal life of the residents |
| resource potential of renewable energy | development potential of hydro power, resource potential of low carbon power, unpredictable nature of PV energy, unpredictable nature of wind energy, wind and PV power forecast error, uneven distribution of wind and PV resources |
| revenue, returns and profit | capital return rate, profits, wind power generation investment recouping, CET revenue |
| social welfare | Residents' well-being |
| subsidy | subsidy expenditure, subsidy policy, subsidy rate |
| tax revenue compensation | tax recovery compensation, carbon tax revenue recycling, income tax deductions, carbon tax recycling |
| technological innovation | Low-carbon technology research and development and application, competitive advantage of low-carbon power generation technologies, technological progress (TO), induced technologically change (ITC), substitution for technological improvement, technological improvement |
| thermal power market share | generated electricity of thermal power units, thermal market share, thermal power, market share in high-emission thermal power, fossil fuel power, fossil fuel input |
| tradable green certificates (TGC) | TGC price |
| transportation consumption | price of transportation |

## Table A4 Top five nodes across a selection of network measures

| **Network Metrics** | **Nodes** | **Types** | **Value** |
| --- | --- | --- | --- |
| **Degree** | Carbon emissions | Factor | 47 |
| carbon tax | Policy | 47 |
| Emissions Trading Scheme (ETS) | Policy | 29 |
| renewable energy market share | Factor | 23 |
| electricity price | Factor | 20 |
| **In-degree** | Carbon emissions | Factor | 44 |
| thermal power market share | Factor | 14 |
| GDP | Factor | 13 |
| renewable energy market share | Factor | 12 |
| electricity price | Factor | 12 |
| **Out-degree** | Carbon tax | Policy | 44 |
| ETS | Policy | 24 |
| Subsidy | Policy | 16 |
| renewable energy market share | Factor | 11 |
| learning-by-doing (LBD) | Factor | 9 |
| **Closeness centrality** | Public health | Factor | 1 |
| regulated market | Factor | 1 |
| carbon emissions | Factor | 0.8 |
| carbon tax | Policy | 0.670213 |
| air pollution/bioenergy/land use | Factor | 0.666667 |
| **Betweenness centrality** | Carbon tax | Policy | 1476.041 |
| electricity price | Factor | 1254.938 |
| ETS | Policy | 726.738 |
| renewable energy market share | Factor | 698.3742 |
| GDP | Factor | 678.0269 |

## Mutual degree submap analysis

This submap reflects pairs of variables that exhibit interactions within the causal network, revealing potential feedback mechanisms and synergetic pathways (Fig. A2). For example, there is a bidirectional positive relationship between renewable energy market share and technological innovation: the expansion of renewable energy capacity provides a broader space for testing and promoting new technologies, while technological innovation, by improving efficiency and reducing costs, in turn drives the growth in the share of renewable energy.





**Fig. A2** Mutual degree submap. The nodes in the submap all have interactions with one or more other nodes.

Feng T, Qu L, Tandon N et al. (2024) From pre-training corpora to large language models: What factors influence llm performance in causal discovery tasks? preprint at arXiv <https://doi.org/10.48550/arXiv.2407.19638>
